# Supplementary material for: Student construction of phylogenetic trees in an introductory biology course
Source: Springer Nature journal article supplement (doi:10.1186/s12052-016-0054-y), 2016-04-21
Supplement: 12052_2016_54_MOESM1_ESM.pdf [file 12052_2016_54_MOESM1_ESM.pdf]

Additional File 1

Use the morphological traits shown in Table A to construct a phylogenetic tree for vertebrates (any style of phylogenetic tree is fine). Be sure to clearly label all synapomorphies.

Table A. morphological traits of vertebrates (X = trait possessed by vertebrate)

|        |               | Vertebrates    |                  |                |                |             |
|--------|---------------|----------------|------------------|----------------|----------------|-------------|
|        |               | Chinook Salmon | Marbled Lungfish | Brown Catshark | Gillaroo Trout | Alpine Newt |
| Traits | True Lungs    |                | X                |                |                | X           |
|        | Gizzard       |                |                  |                | X              |             |
|        | Bone Skeleton | X              | X                |                | X              | X           |
|        | Four Limbs    |                |                  |                |                | X           |
|        | Swim Bladder  | X              |                  |                | X              |             |

Figure S1. Version A of the phylogenetic tree construction task from the individual component of the comprehensive final exam.

Use the morphological traits shown in Table A to construct a phylogenetic tree for vertebrates (any style of phylogenetic tree is fine). Be sure to clearly label all synapomorphies.

Table A. morphological traits of vertebrates (X = trait possessed by vertebrate)

|        |                | Vertebrates         |                  |             |               |              |
|--------|----------------|---------------------|------------------|-------------|---------------|--------------|
|        |                | Saltwater Crocodile | Virginia Opossum | Alpine Newt | Merlin Falcon | Snow Leopard |
| Traits | Placenta       |                     | X                |             |               | X            |
|        | Feathers       |                     |                  |             | X             |              |
|        | Claws/Nails    | X                   | X                |             | X             | X            |
|        | Long Gestation |                     |                  |             |               | X            |
|        | Gizzard        | X                   |                  |             | X             |              |

Figure S2. Version B of the phylogenetic tree construction task from the individual component of the comprehensive final exam.

Use the morphological traits shown in Table A to construct a phylogenetic tree for vertebrates (any style of phylogenetic tree is fine). Be sure to clearly label all synapomorphies.

Table A. morphological traits of vertebrates (X = trait possessed by vertebrate)

|        |               | Vertebrates    |                     |             |               |                |              |                |
|--------|---------------|----------------|---------------------|-------------|---------------|----------------|--------------|----------------|
|        |               | Gillaroo Trout | Saltwater Crocodile | Alpine Newt | Merlin Falcon | Brown Catshark | Snow Leopard | Chinook Salmon |
| Traits | Four Limbs    |                | X                   | X           | X             |                | X            |                |
|        | Gizzard       | X              | X                   |             | X             |                |              |                |
|        | Bone Skeleton | X              | X                   | X           | X             |                | X            | X              |
|        | Claws/Nails   |                | X                   |             | X             |                | X            |                |
|        | Feathers      |                |                     |             | X             |                |              |                |
|        | Swim Bladder  | X              |                     |             |               |                |              | X              |

Figure S3. Phylogenetic tree construction task from the group component of the comprehensive final exam that included convergent evolution (gizzard).

Table S1. Phylogenetic tree styles present in various components of the course curriculum.

| Phylogenetic Tree Style | Course Textbook | Instruction [n=17] | Assessments [n=13] |
|-------------------------|-----------------|--------------------|--------------------|
| Bracket                 | All (100%)      | 11 (65%)           | 3 (23%)            |
| Diagonal                | 0 (0%)          | 6 (35%)            | 7 (54%)            |
| Construction Task       | 0 (0%)          | 0 (0%)             | 3 (23%)            |
